# Supplementary material for: Regulation of VEGFR2 and AKT Signaling by Musashi-2 in Lung Cancer
Source: MDPI journal article supplement (doi:10.3390/cancers15092529), 2023-04-28
Supplement: s1 [file s1]

| siRNA Catalog Number         | Gene Symbol                      | Sequence                                              |
|------------------------------|----------------------------------|-------------------------------------------------------|
| SI04236652 and<br>SI04285834 | Human MSI2 "-si1"<br>(Mixture 2) | ATGAGAGATCCCACTACGAAA<br>and<br>CUGGAUUGGUCAUCAGAUU   |
| SI04312665 and<br>SI04375847 | Human MSI2 "-si2"<br>(Mixture 1) | TCCCAACTTCGTGGCGACCTA<br>and<br>CCAGATAGCCTTAGAGACTAT |

**Supplementary table S3. siRNAs targeting human and murine MSI2.** siRNA reference numbers are from Qiagen (Frederick, MD).
