# Supplementary material for: Regulation of VEGFR2 and AKT Signaling by Musashi-2 in Lung Cancer
Source: MDPI journal article supplement (doi:10.3390/cancers15092529), 2023-04-28
Supplement: s1 [file s1]

| Name                    | Vector                               | Type of insert         | Type of expression        | Cell line origin |
|-------------------------|--------------------------------------|------------------------|---------------------------|------------------|
| A549 pLKO               | Tet-pLKO-puro                        | Empty                  | No                        | Human            |
| A549 sh1                | Tet-pLKO-sh1-puro                    | MSI2-shRNA1            | Inducible                 | Human            |
| A549 sh2                | Tet-pLKO-sh2-puro                    | MSI2-shRNA2            | Inducible                 | Human            |
| A549 pLV                | pLV-CMV-puro                         | Empty                  | No                        | Human            |
| A549 MSI2               | pLV-CMV-MSI2-puro                    | MSI2 ORF               | Constitutive              | Human            |
| A549 pHAGE              | Tet-pLKO-puro<br>pHage-hygro         | Empty<br>Empty         | No<br>No                  | Human            |
| A549 pHAGE MSI2 sh1     | Tet-pLKO-sh1-puro<br>pHage-hygro     | MSI2-shRNA1<br>Empty   | Inducible<br>No           | Human            |
| A549 VEGFR2 OE          | Tet-pLKO-puro<br>pHage-KDR-hygro     | Empty<br>KDR ORF       | No<br>Constitutive        | Human            |
| A549 VEGFR2 OE MSI2 sh1 | Tet-pLKO-sh1-puro<br>pHage-KDR-hygro | MSI2-shRNA1<br>KDR ORF | Inducible<br>Constitutive | Human            |
| H441 pLKO               | Tet-pLKO-puro                        | Empty                  | No                        | Human            |
| H441 sh1                | Tet-pLKO-sh1-puro                    | MSI2-shRNA1            | Inducible                 | Human            |
| H441 sh2                | Tet-pLKO-sh2-puro                    | MSI2-shRNA2            | Inducible                 | Human            |
| H441 pLV                | pLV-CMV-puro                         | Empty                  | No                        | Human            |
| H441 MSI2               | pLV-CMV-MSI2-puro                    | MSI2 ORF               | Constitutive              | Human            |
| H441 pHAGE              | Tet-pLKO-puro<br>pHage-hygro         | Empty<br>Empty         | No<br>No                  | Human            |
| H441 pHAGE MSI2 sh1     | Tet-pLKO-sh1-puro<br>pHage-hygro     | MSI2-shRNA1<br>Empty   | Inducible<br>No           | Human            |
| H441 VEGFR2 OE          | Tet-pLKO-puro<br>pHage-KDR-hygro     | Empty<br>KDR ORF       | No<br>Constitutive        | Human            |
| H441 VEGFR2 OE MSI2 sh1 | Tet-pLKO-sh1-puro<br>pHage-KDR-hygro | MSI2-shRNA1<br>KDR ORF | Inducible<br>Constitutive | Human            |
| Calu-1 pLKO             | Tet-pLKO-puro                        | Empty                  | No                        | Human            |
| Calu-1 sh1              | Tet-pLKO-sh1-puro                    | MSI2-shRNA1            | Inducible                 | Human            |
| Calu-1 sh2              | Tet-pLKO-sh2-puro                    | MSI2-shRNA2            | Inducible                 | Human            |
| Calu-1 pLV              | pLV-CMV-puro                         | Empty                  | No                        | Human            |
| Calu-1 MSI2             | pLV-CMV-MSI2-puro                    | MSI2 ORF               | Constitutive              | Human            |
| Hcc1171 pLV             | pLV-CMV-puro                         | Empty                  | No                        | Human            |
| Hcc1171 MSI2            | pLV-CMV-MSI2-puro                    | MSI2 ORF               | Constitutive              | Human            |
| Hcc1171 pHAGE           | pHage-hygro                          | Empty                  | No                        | Human            |
| Hcc1171 VEGFR2 OE       | pHage-KDR-hygro                      | KDR ORF                | Constitutive              | Human            |
| 344SQ pLKO              | pLKO.1-puro                          | Empty                  | No                        | Mouse            |
| 344SQ sh1               | pLKO-m1-puro                         | MSI2-shRNA1            | Constitutive              | Mouse            |
| 344SQ sh2               | pLKO-m2-puro                         | MSI2-shRNA2            | Constitutive              | Mouse            |

**Supplementary table S2.** List of cell line derivatives used in the study. For human cell lines, the lentiviral vector Tet-pLKO-puro (Addgene, Plasmid #21915) was used for the inducible expression of shRNAs. For murine cell lines, the lentiviral vectors pLKO.1-puro (Addgene, Plasmid #8453) was used for the stable expression of shRNAs. For human cell lines, the pLV-

CMV-puro vector (a kind gift from Dr. A. Ivanov, West Virginia University) was used for the stable expression of the MSI2 cDNA, the pHage-KDR-hygro vector was used for the stable expression of the VEGFR2 cDNA.
