# Supplementary material for: Regulation of VEGFR2 and AKT Signaling by Musashi-2 in Lung Cancer
Source: MDPI journal article supplement (doi:10.3390/cancers15092529), 2023-04-28
Supplement: s1 [file s1]

| <b>Gender</b>           | <b>%</b>     |
|-------------------------|--------------|
| Male                    | 47.4         |
| Female                  | 52.6         |
| <b>Age at diagnosis</b> | <b>Years</b> |
| Mean                    | 62.9         |
| Min                     | 38           |
| Max                     | 81           |
| SD                      | 10.7         |
| <b>Histology</b>        | <b>%</b>     |
| Squamous                | 0            |
| Non-squamous            | 100          |
| <b>Overall stage</b>    | <b>%</b>     |
| 1                       | 12           |
| 2                       | 8.6          |
| 3                       | 57.9         |
| 4                       | 15.5         |
| <b>T stage</b>          | <b>%</b>     |
| 0                       | 0.9          |
| 1                       | 15.5         |
| 2                       | 57.7         |
| 3                       | 8.7          |
| 4                       | 16.3         |
| X                       | 0.9          |
| <b>Lymph Nodes</b>      | <b>%</b>     |
| 0                       | 33.6         |
| 1                       | 12           |
| 2                       | 47.4         |
| 3                       | 4.4          |
| x                       | 2.6          |
| <b>M stage</b>          | <b>%</b>     |
| 0                       | 81.9         |
| 1                       | 15.5         |
| x                       | 2.6          |

**Supplementary Table S8**, Clinical characteristics of NSCLC specimens from Rostov National Research Cancer Institute Human Tissue Repository Facility (Rostov-on-Don, Russia), Republican Clinical Oncology Dispensary named after Prof. M.Z. Sigal (Kazan, Russia) and Fox Chase Cancer Center (Philadelphia, USA). IHC contained specimens from 116 patients with characteristics noted in the table.
