# Supplementary material for: Regulation of VEGFR2 and AKT Signaling by Musashi-2 in Lung Cancer
Source: MDPI journal article supplement (doi:10.3390/cancers15092529), 2023-04-28
Supplement: s1 [file s1]

| Gene symbol<br>(H)-human;<br>(M)-mouse | SYBR Green                                                          | Taqman Life Technologies                                                                                                |
|----------------------------------------|---------------------------------------------------------------------|-------------------------------------------------------------------------------------------------------------------------|
| <i>PTP4A1</i> (H)                      | Fw: 5`-ATCCAACCAATGCGACCTTA<br>Rev: 5`-AAGGCCAATCAAGAACATGG         |                                                                                                                         |
| <i>GAPDH</i> (H)                       | Fw: 5`-TGCACCACCAACTGCTTAGC<br>Rev: 5`-GGCATGGACTGTGGTCATGAG        |                                                                                                                         |
| <i>TGFBR1</i> (H)                      | Fw: 5`- ATCTTGACCTTCTGACCCATC<br>Rev: 5`- TGGCATACCAACATTCTCTCAT    |                                                                                                                         |
| <i>VEGFR2</i> (H)                      | Fw: 5`-CAGAAATGTACCAGACCATGCT<br>Rev: 5`- GGAAGAACAATGTAGTCTTTGCC   |                                                                                                                         |
| <i>VEGF-A</i> (H)                      | Fw: 5`- CCATGAACTTTCTGCTGTCTTG<br>Rev: 5`- GCGCTGATAGACATCCATGA     |                                                                                                                         |
| <i>ERBB3</i> (H)                       | Fw: 5`-TGCTATACAGTGAGGCCAAGACTC<br>Rev: 5`-CAACTCCCAAAGTGTACACCATA  |                                                                                                                         |
| <i>SMAD3</i> (H)                       | Fw: 5`-CCAGCACATAATAACTTGGACCT<br>Rev: 5`-GATGTGTCTCCGTGTCAGCTC     |                                                                                                                         |
| <i>MSI2</i> (H)                        | Fw: 5`-GGTCATGAGAGATCCCACTACG<br>Rev: 5`-TCTACACTTGCTGGGTCTGC       |                                                                                                                         |
| <i>ACTB</i> (H)                        | Fw: 5`- TTGTTACAGGAAGTCCCTTGCC<br>Rev: 5`- ATGCTATCACCTCCCCTGTGTG   |                                                                                                                         |
| <i>PTEN</i> (H)                        | Fw: 5`- GCTCTATACTGCAAATGCTATCG<br>Rev: 5`- CCACAAACAGAACAAGATGCT   |                                                                                                                         |
| <i>18S rRNA</i> (H)                    |                                                                     | Fw: 5` GCTCTTTCTCGATTCCGT<br>Rev: 5`- CCAGAGTCTCGTTCGTTATC<br>Probe: 6fam-<br>TTCTTAGTTGGTGGAGCGATTTGT-<br>Iowa blackFQ |
| <i>Msi2</i> (M)                        | Fw: 5`-AGCAGTATTTTCGAGCAGTTTGGCA<br>Rev: 5`-TGTCGAACATCAGCATCGCATCC |                                                                                                                         |
| <i>Vegfr2</i> (M)                      | Fw: 5`-TTCAGAGTTGGTGGAGCATT<br>Rev: 5`-CTCTTCCATGCTCAGTGTCTC        |                                                                                                                         |
| <i>Vegfa</i> (M)                       | Fw: 5`-AGAAAGACAGAACAAAGCCAGA<br>Rev: 5`-TGGTGACATGGTTAATCGGT       |                                                                                                                         |
| <i>Polr2a</i> (M)                      | Fw: 5`- GGTCCCTTCGAATCCGCATC<br>Rev: 5`- CAGGGTCATATCTGTCAGCATG     |                                                                                                                         |

**Supplementary Table S4. Primers used for RT-PCR to quantify gene expression.** List of primers used for SYBR Green assays, and TaqMan gene expression assays, used for the qRT-PCR analysis of gene expression and RNA immunoprecipitation.
